# Supplementary material for: Longitudinal changes of health-related quality of life over 10 years in breast cancer patients treated with radiotherapy following breast-conserving surgery
Source: PubMed Central journal article supplement (PMC10393846; doi:10.1007/s11136-023-03408-y), 2023-04-24
Supplement: 11136_2023_3408_MOESM1_ESM.pdf [file 11136_2023_3408_MOESM1_ESM.pdf]

**Article:** Longitudinal course of health-related quality of life over 10 years in breast cancer patients treated with radiotherapy following breast-conserving surgery

**Journal:** Quality of Life Research

**Authors:** Yifeng Gao, Juan Camilo Rosas Romero, Hanna Fink, Sabine Behrens, Jenny Chang-Claude, Petra Seibold

**\*Corresponding author:**

Dr. Petra Seibold

Division of Cancer Epidemiology

German Cancer Research Center (DKFZ), Im Neuenheimer Feld 581, 69221 Heidelberg, Germany

E-mail: [p.seibold@dkfz-heidelberg.de](mailto:p.seibold@dkfz-heidelberg.de)

Section 1. Study cohort characteristics

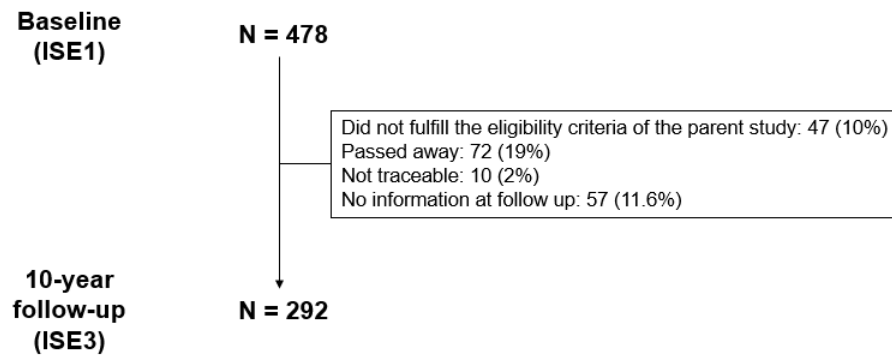

Figure S1. CONSORT diagram of breast cancer patient cohort.

Section 2. Subgroup analysis

(a)

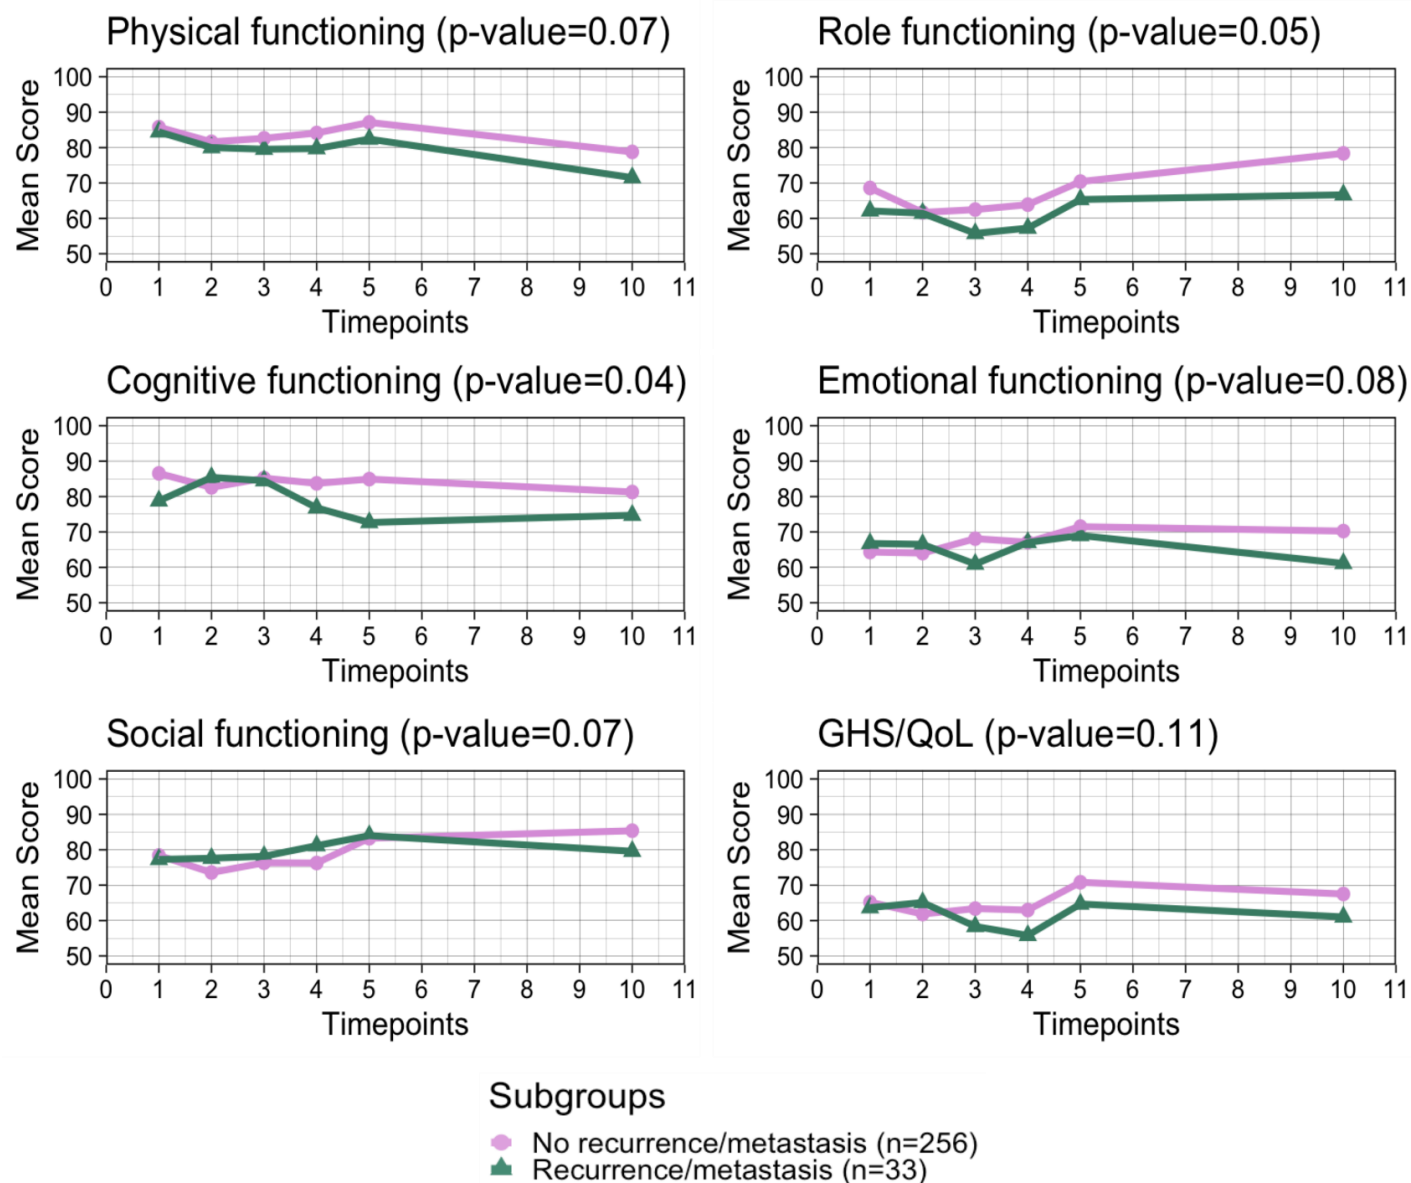

Figure S2. Cont.

(b)

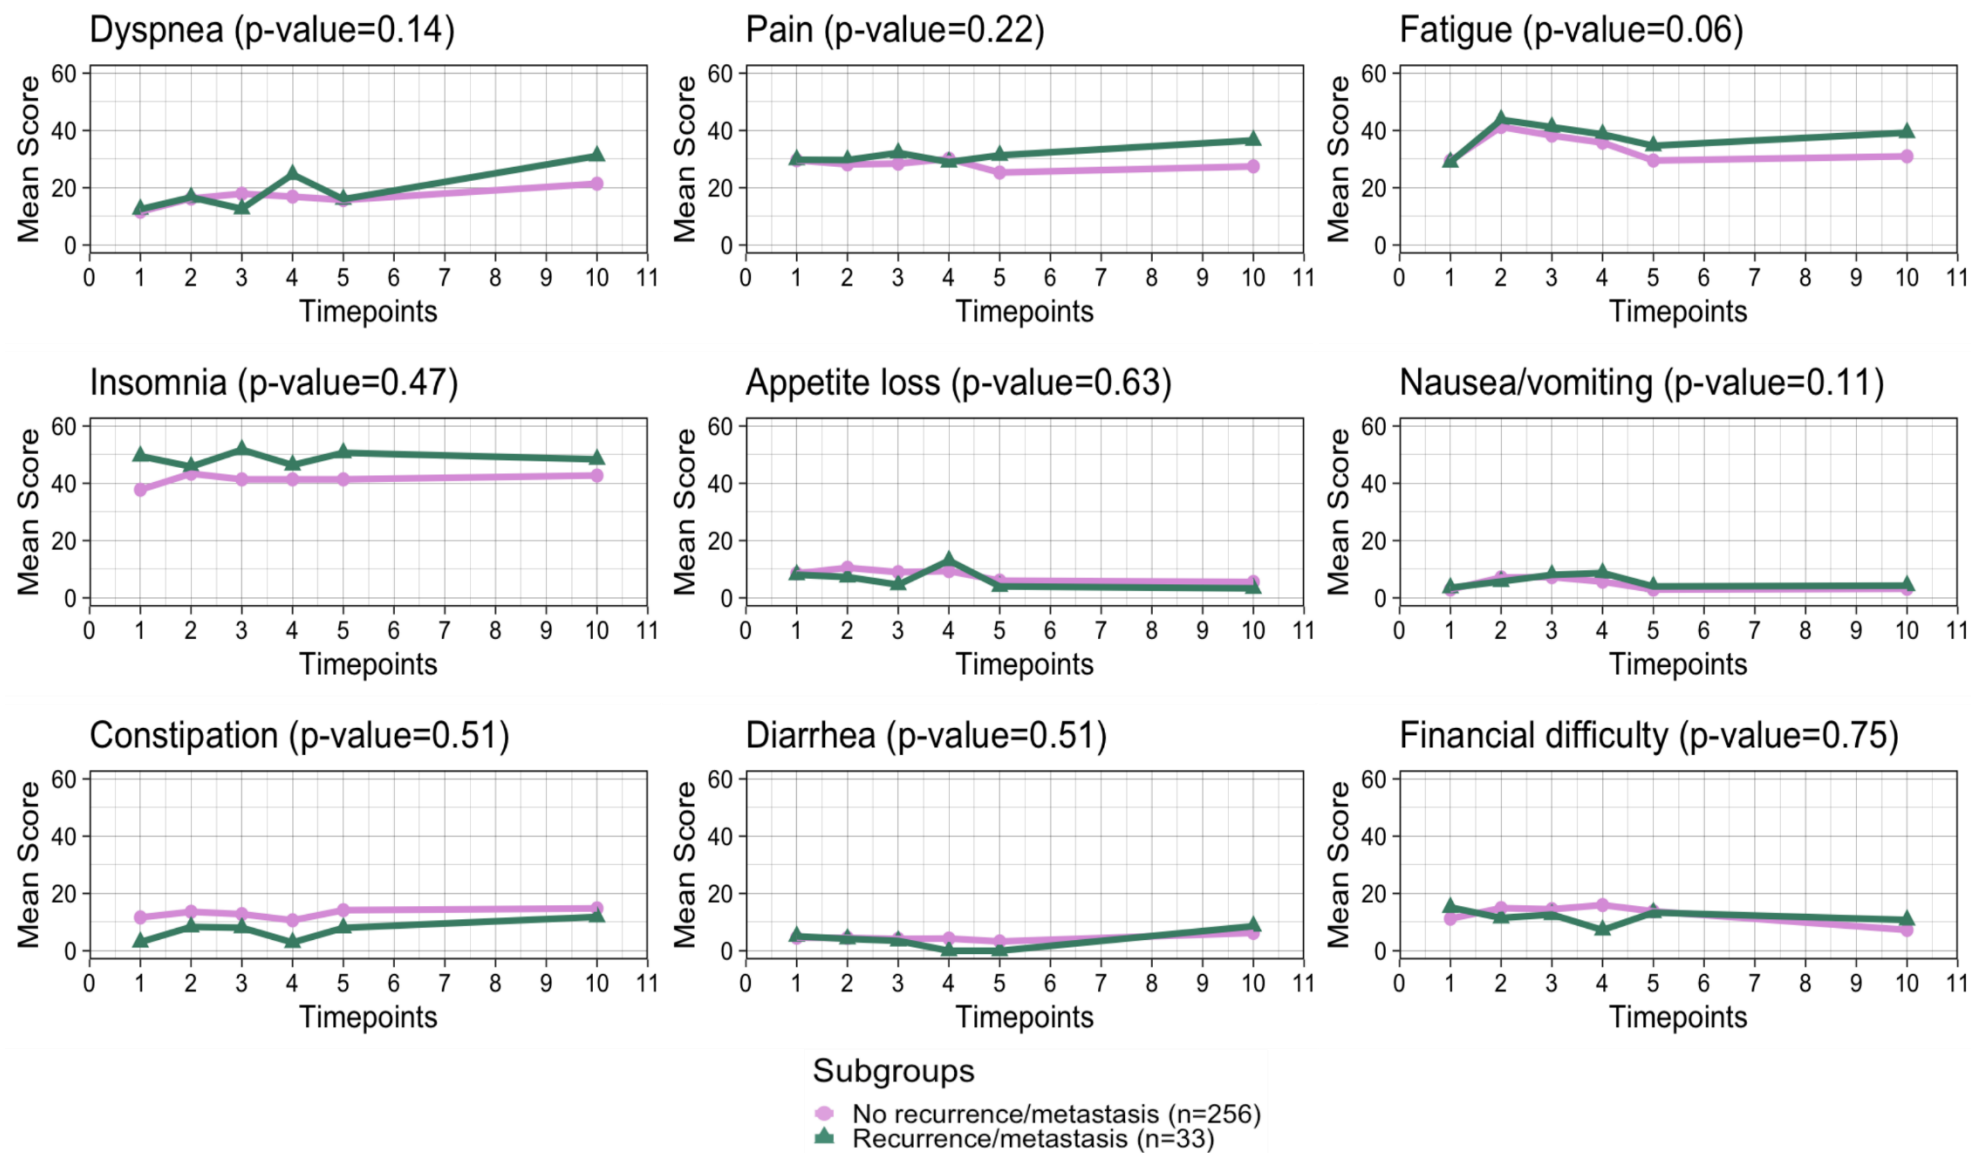

**Figure S2.** Mean QLQ-C30 scores for (a) Global Health Status/Quality of Life (GHS/QoL), functional and (b) symptom domains from baseline to 10 years after diagnosis by recurrence/metastases status. P-values indicate the heterogeneity at the 10-year time-point. No statistical significance at the previous time-points.

Section 3. Cross-sectional comparison between breast cancer patients and control population

**Table S1.** Wilcoxon rank-sum test for differences of EORTC QLQ-C30 scores in Global Health Status/Quality of Life (GHS/QoL), functional and symptom scales/items between breast cancer patients and control population at the 10-year follow-up after age-stratification

|                           | Wilcoxon Test for Differences between ISE3 & MARIE Control |                  |                  |                              |                  |                  |                              |                  |               |
|---------------------------|------------------------------------------------------------|------------------|------------------|------------------------------|------------------|------------------|------------------------------|------------------|---------------|
|                           | Age < 65 (N=169)                                           |                  |                  | 65 <= Age < 75 (N=956)       |                  |                  | Age >= 75 (N=841)            |                  |               |
|                           | means of EORTC QLQ-C30 score                               |                  | p-value          | means of EORTC QLQ-C30 score |                  | p-value          | means of EORTC QLQ-C30 score |                  | p-value       |
|                           | patients (N=69)                                            | controls (N=100) |                  | patients (N=145)             | controls (N=811) |                  | patients (N=78)              | controls (N=763) |               |
| <b>Global HRQoL</b>       |                                                            |                  |                  |                              |                  |                  |                              |                  |               |
| GHS/QoL                   | 66.30                                                      | 68.79            | 0.61             | 70.36                        | 66.81            | 0.09             | 61.22                        | 61.13            | 0.94          |
| <b>Functional domains</b> |                                                            |                  |                  |                              |                  |                  |                              |                  |               |
| Physical functioning      | 81.55                                                      | 87.13            | <b>0.044*</b>    | 80.34                        | 82.79            | <b>0.041*</b>    | 69.12                        | 71.43            | 0.34          |
| Role functioning          | 78.26                                                      | 86.20            | <b>0.034*</b>    | 79.25                        | 82.46            | 0.08             | 72.08                        | 71.75            | 0.97          |
| Cognitive functioning     | 80.43                                                      | 84.17            | 0.51             | 82.05                        | 86.70            | 0.14             | 77.49                        | 81.04            | 0.65          |
| Emotional functioning     | 63.08                                                      | 74.50            | <b>0.008**</b>   | 71.42                        | 76.97            | <b>0.004**</b>   | 69.70                        | 75.23            | <b>0.046*</b> |
| Social functioning        | 82.61                                                      | 87.00            | 0.14             | 85.92                        | 85.33            | 0.74             | 84.62                        | 81.67            | 0.61          |
| <b>Symptom domains</b>    |                                                            |                  |                  |                              |                  |                  |                              |                  |               |
| Dyspnea                   | 25.60                                                      | 18.03            | <b>0.026*</b>    | 20.00                        | 20.02            | 0.87             | 23.68                        | 26.02            | 0.57          |
| Pain                      | 27.54                                                      | 27.27            | 0.85             | 25.41                        | 27.69            | 0.63             | 35.04                        | 35.90            | 0.69          |
| Fatigue                   | 35.51                                                      | 25.03            | <b>0.002**</b>   | 28.94                        | 26.37            | <b>0.018*</b>    | 35.50                        | 36.07            | 0.72          |
| Insomnia                  | 50.72                                                      | 31.97            | <b>0.0006***</b> | 38.97                        | 35.33            | <b>0.014*</b>    | 46.15                        | 37.54            | 0.06          |
| Appetite loss             | 3.43                                                       | 6.06             | 0.65             | 4.43                         | 5.24             | 0.55             | 9.09                         | 8.92             | 0.70          |
| Nausea/vomiting           | 5.56                                                       | 6.06             | 0.61             | 2.68                         | 3.28             | 0.93             | 2.85                         | 3.88             | 0.92          |
| Constipation              | 16.91                                                      | 8.08             | 0.07             | 11.74                        | 7.40             | <b>0.0001***</b> | 18.42                        | 13.99            | 0.27          |
| Diarrhea                  | 8.70                                                       | 8.42             | 0.41             | 3.76                         | 8.15             | <b>0.041*</b>    | 9.09                         | 7.21             | 0.36          |
| Financial difficulty      | 12.08                                                      | 6.67             | 0.12             | 5.13                         | 5.23             | 0.70             | 8.23                         | 7.07             | 0.71          |

$\alpha=0.05$ ; \* $p<0.05$ , \*\* $p<0.01$ , \*\*\* $p<0.001$

Abbreviations: GHS/QoL: Global Health Status/Quality of Life

Section 4. Multiple linear regression model

**Table S2.** Multiple linear regression models on Global Health Status/Quality of Life (GHS/QoL), functional and symptom domains in breast cancer patients at the 10-year follow-up

(a) Functional domains and GHS/QoL (model with best fits)

| Covariates                                     | N   | Functional domains & GHS/QoL (0 - 100)       |                         |                                         |                          |                                              |                          |                                              |                            |                                           |                          |                                |                          |
|------------------------------------------------|-----|----------------------------------------------|-------------------------|-----------------------------------------|--------------------------|----------------------------------------------|--------------------------|----------------------------------------------|----------------------------|-------------------------------------------|--------------------------|--------------------------------|--------------------------|
|                                                |     | Physical Functioning (R <sup>2</sup> = 14.8) |                         | Role Functioning (R <sup>2</sup> = 6.6) |                          | Cognitive Functioning (R <sup>2</sup> = 5.4) |                          | Emotional Functioning (R <sup>2</sup> = 9.9) |                            | Social Functioning (R <sup>2</sup> = 8.5) |                          | GHS/QoL (R <sup>2</sup> = 7.9) |                          |
|                                                |     | β                                            | (95% CI)                | β                                       | (95% CI)                 | β                                            | (95% CI)                 | β                                            | (95% CI)                   | β                                         | (95% CI)                 | β                              | (95% CI)                 |
| <b>Age</b>                                     |     |                                              |                         |                                         |                          |                                              |                          |                                              |                            |                                           |                          |                                |                          |
| < 65                                           | 69  |                                              |                         |                                         |                          |                                              |                          |                                              |                            |                                           |                          |                                |                          |
| 65 - <75                                       | 145 |                                              |                         |                                         |                          |                                              |                          |                                              |                            |                                           |                          |                                |                          |
| > 75                                           | 78  |                                              |                         |                                         |                          |                                              |                          |                                              |                            |                                           |                          |                                |                          |
| <b>Living with others</b>                      | 202 | <b>8.35</b>                                  | <b>(2.44, 14.25)*</b>   |                                         |                          |                                              |                          |                                              |                            |                                           |                          |                                |                          |
| <b>BMI &gt;= 25 kg/m2</b>                      | 152 | <b>-6.33</b>                                 | <b>(-11.94, -0.72)*</b> |                                         |                          |                                              |                          |                                              |                            |                                           |                          | <b>-6.46</b>                   | <b>(-12.2, -0.74)*</b>   |
| <b>Smoking Status</b>                          |     |                                              |                         |                                         |                          |                                              |                          |                                              |                            |                                           |                          |                                |                          |
| Never smoked                                   | 193 |                                              |                         | Ref.                                    |                          | Ref.                                         |                          |                                              |                            |                                           |                          |                                |                          |
| Quit smoking                                   | 62  |                                              |                         | 0.74                                    | (-8.37, 9.85)            | -0.66                                        | (-7.95, 6.62)            |                                              |                            |                                           |                          |                                |                          |
| Current smoker                                 | 30  |                                              |                         | 9.44                                    | (-1.83, 20.71)           | <b>10.17</b>                                 | <b>(0.71, 19.62)*</b>    |                                              |                            |                                           |                          |                                |                          |
| <b>Other adjuvant treatments</b>               |     |                                              |                         |                                         |                          |                                              |                          |                                              |                            |                                           |                          |                                |                          |
| Aromatase inhibitors                           | 52  | -6.1                                         | (-12.99, 0.81)          |                                         |                          |                                              |                          |                                              |                            |                                           |                          |                                |                          |
| Tamoxifen                                      | 219 |                                              |                         |                                         |                          |                                              |                          |                                              |                            |                                           |                          |                                |                          |
| <b>Chronic Diseases</b>                        |     |                                              |                         |                                         |                          |                                              |                          |                                              |                            |                                           |                          |                                |                          |
| Depression                                     | 43  | -6.88                                        | (-14.3, 0.54)           | <b>-13.67</b>                           | <b>(-23.28, -4.1)**</b>  | <b>-8.92</b>                                 | <b>(-16.84, -0.99)*</b>  | <b>-20.28</b>                                | <b>(-28.82, -11.73)***</b> | -7.95                                     | (-16.82, 0.92)           | <b>-11.46</b>                  | <b>(-18.92, -4.0)**</b>  |
| Hypertension                                   | 148 | <b>-8.12</b>                                 | <b>(-13.77, -2.5)**</b> | <b>-10.54</b>                           | <b>(-17.73, -3.34)**</b> |                                              |                          | -5.28                                        | (-11.69, 1.14)             | -3.95                                     | (-10.47, 2.58)           | <b>-6.33</b>                   | <b>(-12.06, -0.59)**</b> |
| Stroke                                         | 11  |                                              |                         |                                         |                          | <b>-20.97</b>                                | <b>(-35.43, -6.50)**</b> | <b>-17.83</b>                                | <b>(-35.65, -0.02)*</b>    |                                           |                          |                                |                          |
| Diabetes                                       | 25  |                                              |                         |                                         |                          |                                              |                          |                                              |                            |                                           |                          |                                |                          |
| <b>Recurrence, metastases and other tumors</b> | 33  |                                              |                         | -7.43                                   | (-18.33, 3.46)           |                                              |                          | -3.85                                        | (-13.92, 6.21)             | -9.97                                     | (-22.24, 2.3)            | -5.57                          | (-14.1, 2.92)            |
| <b>Other Symptoms</b>                          |     |                                              |                         |                                         |                          |                                              |                          |                                              |                            |                                           |                          |                                |                          |
| Pain/Lymphedema                                | 19  | <b>-10.29</b>                                | <b>(-20.3, -0.27)*</b>  |                                         |                          |                                              |                          |                                              |                            | <b>-18.1</b>                              | <b>(-30.87, -5.28)**</b> |                                |                          |
| Fibrosis                                       | 87  |                                              |                         |                                         |                          |                                              |                          |                                              |                            | <b>-8.1</b>                               | <b>(-15.1, -1.13)*</b>   |                                |                          |

This table included all covariates after AIC selection; covariates were assessed at the 10-year follow-up; N refers to the overall frequency for every level; \*p<0.05, \*\*p<0.01, \*\*\*p<0.001

Abbreviations: GHS/QoL: Global Health Status/Quality of Life; BMI: Body mass index

(b) Symptom domains (model with best fits)

| Covariates                                     | N   | Symptom domains (0-100)         |                           |                             |                         |                                |                         |                                 |                       |                                      |                         |                                        |                       |                                     |                       |                                  |          |                                              |                          |      |                |
|------------------------------------------------|-----|---------------------------------|---------------------------|-----------------------------|-------------------------|--------------------------------|-------------------------|---------------------------------|-----------------------|--------------------------------------|-------------------------|----------------------------------------|-----------------------|-------------------------------------|-----------------------|----------------------------------|----------|----------------------------------------------|--------------------------|------|----------------|
|                                                |     | Dyspnea (R <sup>2</sup> = 20.2) |                           | Pain (R <sup>2</sup> = 5.4) |                         | Fatigue (R <sup>2</sup> = 6.5) |                         | Insomnia (R <sup>2</sup> = 2.9) |                       | Appetite Loss (R <sup>2</sup> = 4.9) |                         | Nausea/Vomiting (R <sup>2</sup> = 4.2) |                       | Constipation (R <sup>2</sup> = 2.1) |                       | Diarrhea (R <sup>2</sup> = -0.1) |          | Financial Difficulty (R <sup>2</sup> = 11.1) |                          |      |                |
|                                                |     | β                               | (95% CI)                  | β                           | (95% CI)                | β                              | (95% CI)                | β                               | (95% CI)              | β                                    | (95% CI)                | β                                      | (95% CI)              | β                                   | (95% CI)              | β                                | (95% CI) | β                                            | (95% CI)                 |      |                |
| <b>Age</b>                                     |     |                                 |                           |                             |                         |                                |                         |                                 |                       |                                      |                         |                                        |                       |                                     |                       |                                  |          |                                              |                          |      |                |
| < 65                                           | 69  | Ref.                            |                           |                             |                         |                                |                         |                                 | Ref.                  |                                      |                         |                                        |                       |                                     |                       |                                  |          |                                              |                          |      |                |
| 65 - <75                                       | 145 | <b>-12.2</b>                    | <b>(-22.62, -1.79)*</b>   |                             |                         |                                |                         |                                 | 1.29                  | (-3.29, 5.87)                        |                         |                                        |                       |                                     |                       |                                  |          |                                              |                          |      |                |
| > 75                                           | 78  | <b>-19.5</b>                    | <b>(-32.6, -6.4)**</b>    |                             |                         |                                |                         |                                 | <b>6.85</b>           | <b>(1.44, 12.25)*</b>                |                         |                                        |                       |                                     |                       |                                  |          |                                              |                          |      |                |
| <b>Living with others</b>                      | 202 | <b>-17.1</b>                    | <b>(-26.72, -7.49)***</b> | <b>-10.7</b>                | <b>(-19.73, -1.57)*</b> |                                |                         |                                 |                       |                                      |                         |                                        |                       |                                     |                       |                                  |          |                                              |                          |      |                |
| <b>BMI &gt;= 25 kg/m2</b>                      | 152 |                                 |                           |                             |                         |                                |                         |                                 |                       |                                      |                         |                                        |                       |                                     |                       |                                  |          |                                              |                          |      |                |
| <b>Smoking Status</b>                          |     |                                 |                           |                             |                         |                                |                         |                                 |                       |                                      |                         |                                        |                       |                                     |                       |                                  |          |                                              |                          |      |                |
| Never smoked                                   | 193 |                                 |                           |                             |                         |                                |                         |                                 |                       |                                      |                         |                                        |                       |                                     |                       |                                  |          |                                              |                          |      |                |
| Quit smoking                                   | 62  |                                 |                           |                             |                         |                                |                         |                                 |                       |                                      |                         |                                        |                       |                                     |                       |                                  |          |                                              |                          |      |                |
| Current smoker                                 | 30  |                                 |                           |                             |                         |                                |                         |                                 |                       |                                      |                         |                                        |                       |                                     |                       |                                  |          |                                              |                          |      |                |
| <b>Other adjuvant treatments</b>               |     |                                 |                           |                             |                         |                                |                         |                                 |                       |                                      |                         |                                        |                       |                                     |                       |                                  |          |                                              |                          |      |                |
| Aromatase inhibitors                           | 52  | <b>16.43</b>                    | <b>(5.4, 27.47)**</b>     |                             |                         |                                |                         |                                 | 1.68                  | (-2.91, 6.27)                        |                         |                                        |                       |                                     |                       |                                  |          |                                              |                          |      |                |
| Tamoxifen                                      | 219 |                                 |                           | <b>11.32</b>                | <b>(0.16, 22.5)*</b>    |                                |                         |                                 |                       |                                      |                         |                                        |                       |                                     |                       |                                  |          |                                              |                          |      |                |
| <b>Chronic Diseases</b>                        |     |                                 |                           |                             |                         |                                |                         |                                 |                       |                                      |                         |                                        |                       |                                     |                       |                                  |          |                                              |                          |      |                |
| Depression                                     | 43  | 7.26                            | (-4.12, 18.64)            | <b>11.3</b>                 | <b>(0.54, 22.05)*</b>   | <b>14.83</b>                   | <b>(6.13, 23.53)***</b> | <b>16.01</b>                    | <b>(3.71, 28.30)*</b> | <b>7.83</b>                          | <b>(2.76, 12.89)***</b> | <b>6.3</b>                             | <b>(2.68, 9.9)***</b> | <b>11.44</b>                        | <b>(2.48, 20.41)*</b> |                                  |          | <b>16.35</b>                                 | <b>(10.39, 22.32)***</b> |      |                |
| Hypertension                                   | 148 | <b>15.11</b>                    | <b>(6.26, 23.95)***</b>   | 6.37                        | (-1.99, 14.74)          | <b>8.44</b>                    | <b>(1.88, 15.0)*</b>    | 8.35                            | (-0.81, 17.51)        |                                      |                         | 1.06                                   | (-1.64, 3.76)         |                                     |                       |                                  |          | 3.27                                         | (-1.18, 7.73)            |      |                |
| Stroke                                         | 11  | <b>25.18</b>                    | <b>(1.8, 48.57)*</b>      |                             |                         |                                |                         |                                 |                       |                                      |                         | 4.1                                    | (-2.98, 11.13)        |                                     |                       |                                  |          |                                              |                          |      |                |
| Diabetes                                       | 25  | <b>18.72</b>                    | <b>(4.8, 32.64)**</b>     |                             |                         |                                |                         |                                 |                       |                                      |                         |                                        |                       |                                     |                       |                                  |          | 2.88                                         | (-3.79, 9.54)            | 5.46 | (-2.11, 13.07) |
| <b>Recurrence, metastases and other tumors</b> | 33  | 7.22                            | (-6.14, 20.59)            | 6.87                        | (-5.73, 19.47)          | 6.95                           | (-3.1, 17.0)            |                                 |                       |                                      |                         |                                        |                       |                                     |                       |                                  |          |                                              |                          |      |                |

This table included all covariates after AIC selection; covariates were assessed at the 10-year follow-up; N refers to the overall frequency for every level; \*p<0.05, \*\*p<0.01, \*\*\*p<0.001

Abbreviations: BMI: Body mass index
